# Supplementary material for: Measurement report: Exploring NH 3 behavior in urban and suburban Beijing: comparison and implications
Source: Copernicus journal article supplement (doi:10.5194/acp-21-4561-2021), 2021-03-24
Supplement: Supplementary file 1 [file acp-21-4561-2021-supplement.pdf]

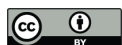

*Supplement of*

## **Measurement report: Exploring NH<sub>3</sub> behavior in urban and suburban Beijing: comparison and implications**

**Ziru Lan et al.**

*Correspondence to:* Weili Lin (linwl@muc.edu.cn)

The copyright of individual parts of the supplement might differ from the article licence.

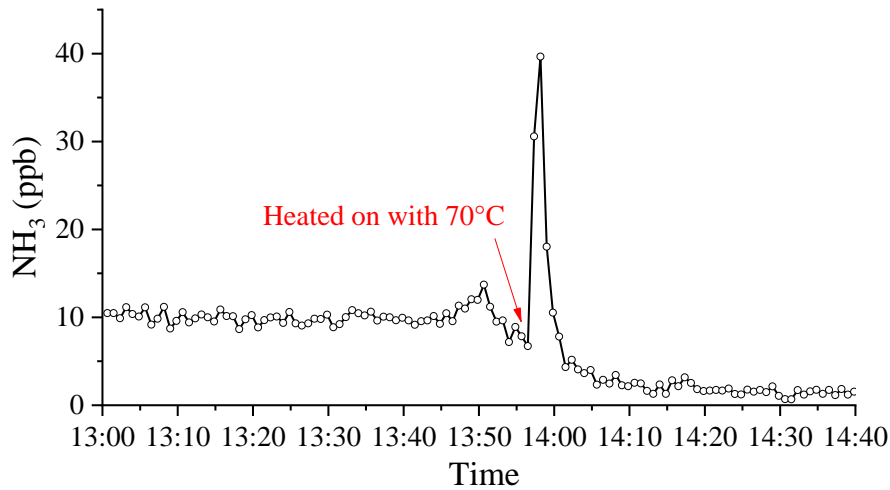

1

2 Figure S1. New balance established in 5–6 min after inlet heated. When heating (70°C) was on, there did have a peak lasting  
 3 several minutes and then decreasing to the normal levels in ambient air, which means a new balancing process has been  
 4 established. Heated filters are not suggested here because it will promote the thermal decomposition of ammonium salt in the  
 5 particulate matter accumulated at the filter.

6

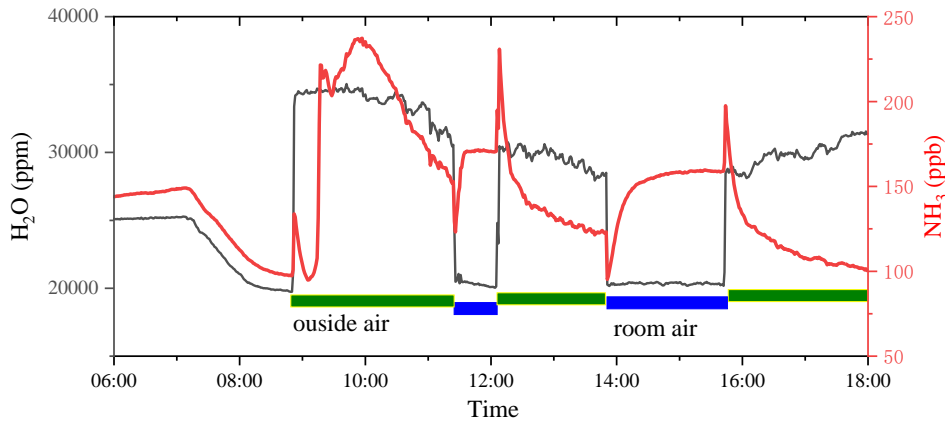

7

8 Figure S2. The response of NH<sub>3</sub> and H<sub>2</sub>O as the sample air was switched between room air and outside air. Graph is plotted with  
 9 1-min average data. Under these extreme changes of H<sub>2</sub>O, NH<sub>3</sub> exhibited a response less than 1 hour. The response time is faster  
 10 when going from low to high concentrations than from high to low one. The test tells us that it's sound to present the NH<sub>3</sub> in  
 11 hourly mean, although minute-average data might have some limitations.

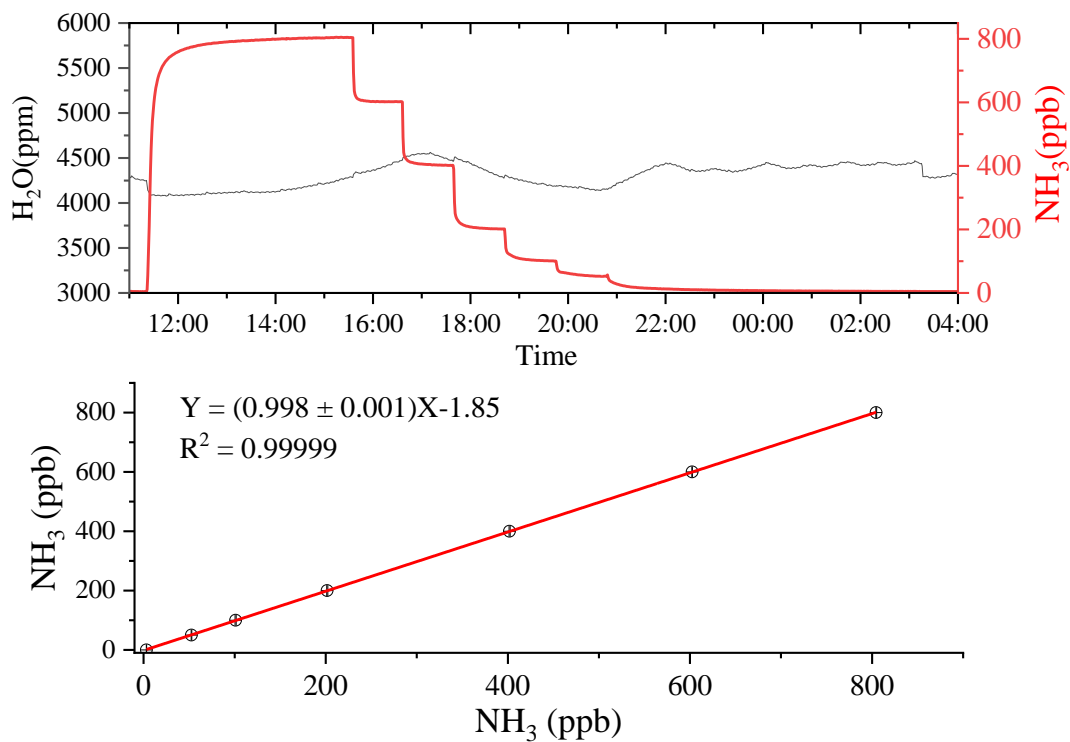

12

13 Figure S3. A typical multiple-point calibration of NH<sub>3</sub> analyzer with a cylinder standard gas.

14

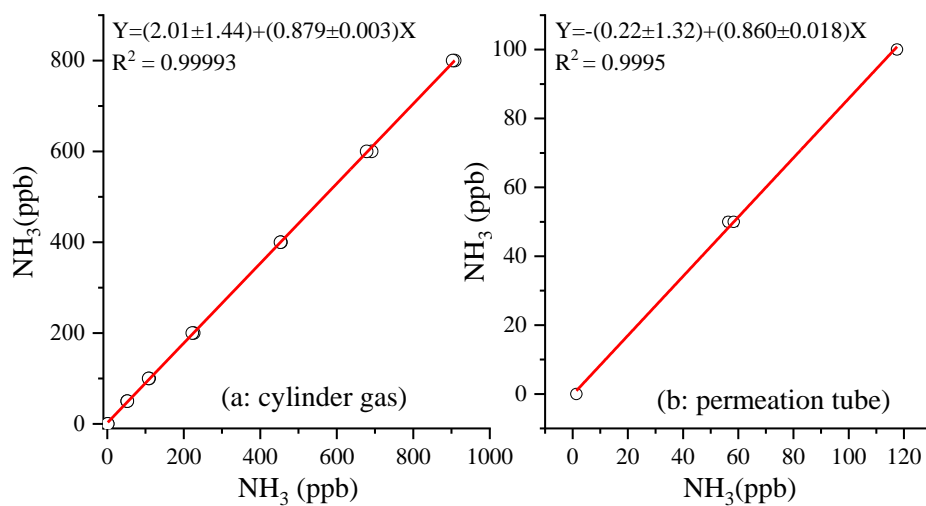

15

16 Figure S4. A comparable calibration result from a standard gas cylinder and from a permeation tube

17

18

19

20

21 As seen in figure S5, similar correlations of diurnal  $\text{NH}_3$  with Temperature(T), relative humidity (RH)  
 22 were found in spring but different in other seasons at urban and suburban Beijing.

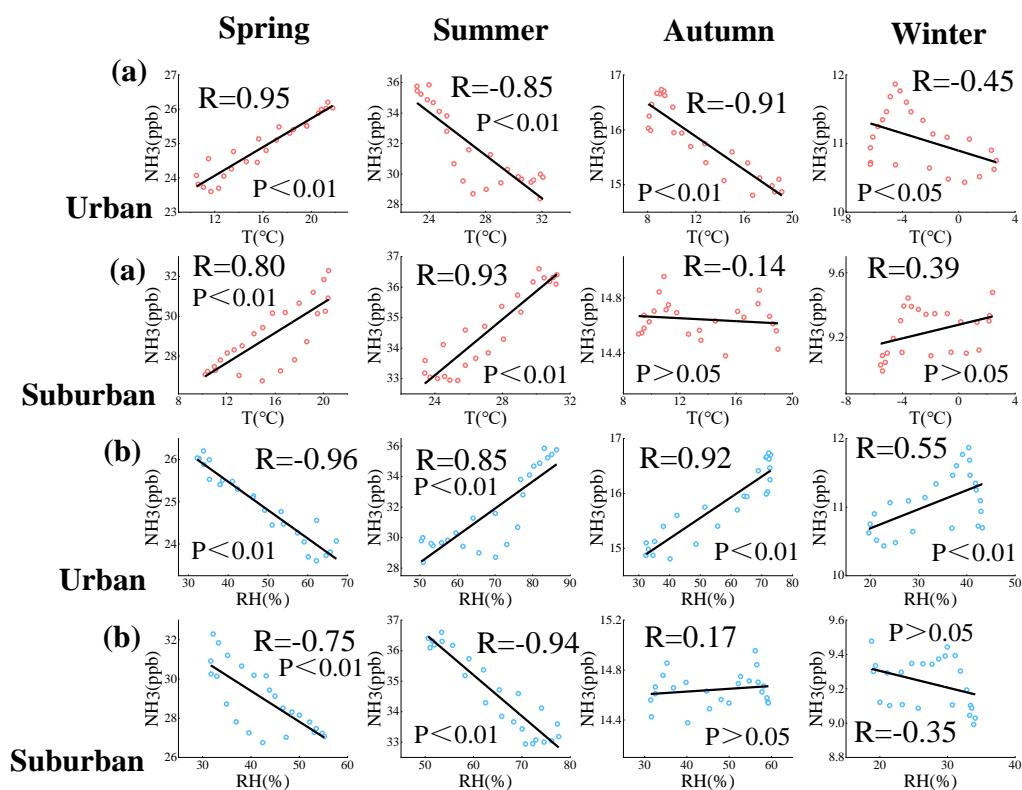

23  
 24 **Fig. S5.** Correlations of diurnal  $\text{NH}_3$  with Temperature(T), relative humidity (RH) in different seasons at urban and suburban Beijing.

25  
 26 As see in Fig. S6, the annual diurnal variations in the  $\text{NH}_3$  mixing ratio at the urban site were  
 27 significantly and negatively (positively) correlated with the temperature (relative humidity). By  
 28 contrast, the annual diurnal variations in the  $\text{NH}_3$  mixing ratio at the suburban site were significantly  
 29 and positively (negatively) correlated with the temperature (relative humidity). In general, the diurnal  
 30 behaviors of  $\text{NH}_3$  with temperature and relative humidity were different at the urban and suburban  
 31 sites.

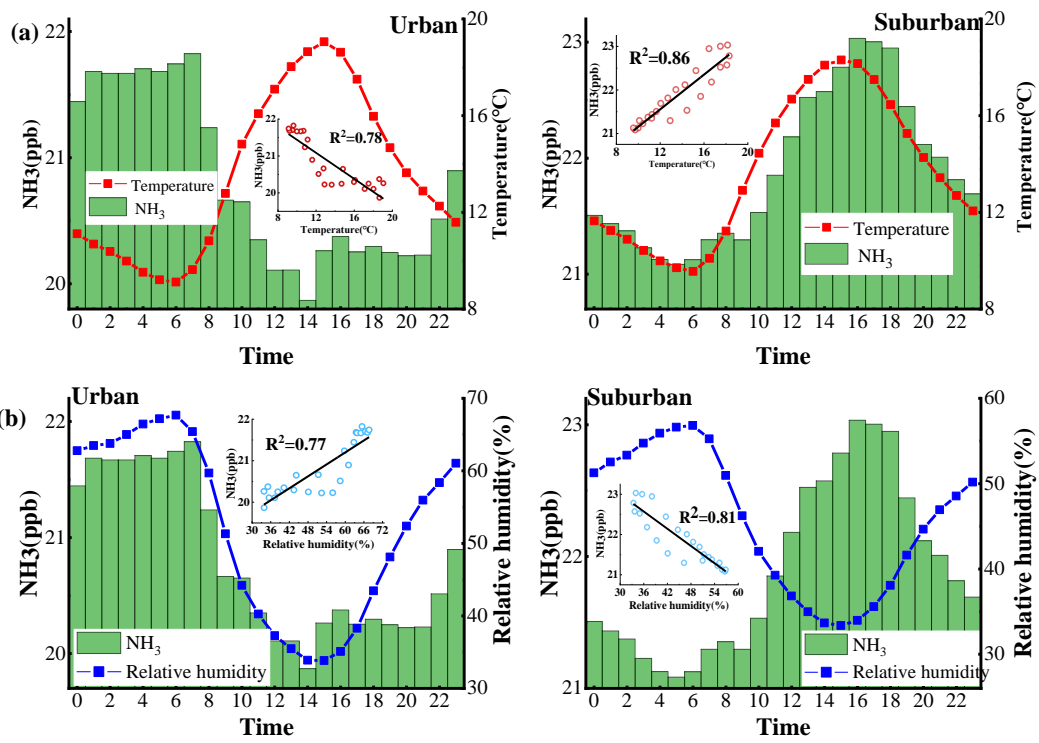

32

33 Fig. S6. Annual diurnal variations in and correlations between the NH<sub>3</sub> mixing ratios and temperature (a), relative humidity (b).

34

35 As see in Fig. S7, the NH<sub>3</sub> mixing ratios at both sites increased with the relative humidity at the same

36 temperature and increased with the temperature at the same relative humidity. The maps were plotted

37 using all the measurement data.

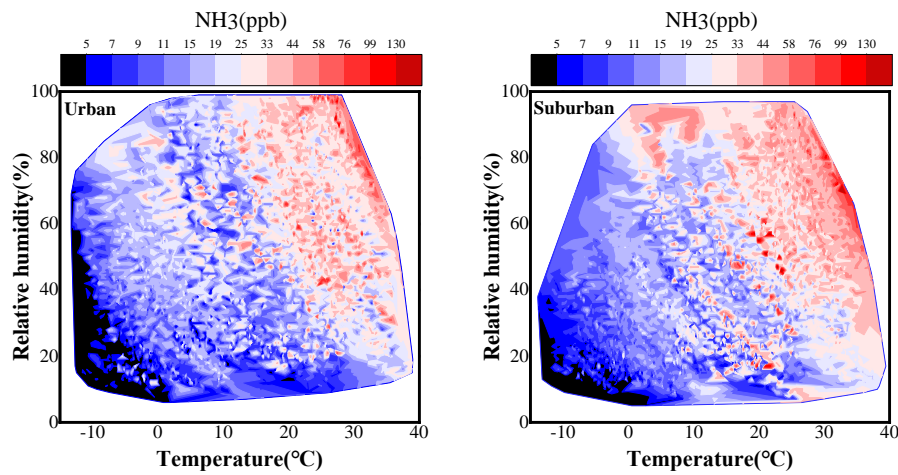

38

39 Fig. S7. Contour maps of the NH<sub>3</sub> mixing ratio, temperature, and relative humidity at urban and suburban sites in Beijing.
